# Supplementary material for: Genomic Characterization, Formulation and Efficacy in Planta of a Siphoviridae and Podoviridae Protection Cocktail against the Bacterial Plant Pathogens Pectobacterium spp
Source: MDPI journal article supplement (doi:10.3390/v12020150), 2020-01-28
Supplement: s1 [file s1]

**Table 1.** Bacterial strains used in this study.

| Isolate Id   | Location   | Year | Cavity formation on CVP media [30] | Y1 & Y2— <i>P. atrosepticum</i> [53] | ECA primers— <i>P. atrosepticum</i> [54] | PEC primers— <i>Pectobacterium</i> and <i>Dickeya</i> spp. [54] | ECH primers— <i>Dickeya</i> spp. [54] | RecAF & RecAR—formerly <i>Erwinia</i> spp. [55] | Y45 & Y46—formerly <i>P. carotovorum</i> [56] | DNA sequencing <sup>a</sup> | Species identified (Accession number)      |
|--------------|------------|------|------------------------------------|--------------------------------------|------------------------------------------|-----------------------------------------------------------------|---------------------------------------|-------------------------------------------------|-----------------------------------------------|-----------------------------|--------------------------------------------|
| O7/16        | Co. Antrim | 2016 | +                                  | nt                                   | +                                        | +                                                               | -                                     | +                                               | -                                             | -                           | <i>P. atrosepticum</i>                     |
| O7B/16       | Co. Antrim | 2016 | +                                  | nt                                   | +                                        | +                                                               | -                                     | +                                               | -                                             | -                           | <i>P. atrosepticum</i>                     |
| O17A/16      | Co. Antrim | 2016 | +                                  | nt                                   | +                                        | +                                                               | -                                     | +                                               | -                                             | -                           | <i>P. atrosepticum</i>                     |
| 05A/16       | Co. Down   | 2016 | +                                  | -                                    | -                                        | +                                                               | -                                     | +                                               | +                                             | -                           | <i>Pectobacterium</i>                      |
| 05B/16       | Co. Down   | 2016 | +                                  | -                                    | -                                        | +                                                               | -                                     | +                                               | +                                             | -                           | <i>Pectobacterium</i>                      |
| 06/16-1      | Co. Down   | 2016 | +                                  | -                                    | -                                        | +                                                               | -                                     | +                                               | +                                             | -                           | <i>Pectobacterium</i>                      |
| OM/Z-1/15    | Co. Armagh | 2015 | +                                  | -                                    | -                                        | +                                                               | -                                     | +                                               | +                                             | -                           | <i>Pectobacterium</i>                      |
| OM/Z-4/15    | Co. Armagh | 2015 | +                                  | -                                    | -                                        | +                                                               | -                                     | +                                               | +                                             | -                           | <i>Pectobacterium</i>                      |
| OM/Z-5/15    | Co. Armagh | 2015 | +                                  | -                                    | -                                        | +                                                               | -                                     | +                                               | +                                             | +                           | <i>P.c. subsp. carotovorum</i> (MN922297 ) |
| O12/16       | Co. Antrim | 2016 | +                                  | nt                                   | -                                        | +                                                               | -                                     | +                                               | nt                                            | -                           | <i>Pectobacterium</i>                      |
| O17B/16      | Co. Antrim | 2016 | +                                  | nt                                   | -                                        | +                                                               | -                                     | +                                               | nt                                            | -                           | <i>Pectobacterium</i>                      |
| O7C/16       | Co. Antrim | 2016 | +                                  | nt                                   | -                                        | +                                                               | -                                     | +                                               | nt                                            | -                           | <i>Pectobacterium</i>                      |
| 015/16       | Co. Antrim | 2016 | +                                  | nt                                   | -                                        | +                                                               | -                                     | +                                               | nt                                            | -                           | <i>Pectobacterium</i>                      |
| OM/Z-1/10/15 | Co. Armagh | 2015 | +                                  | -                                    | -                                        | +                                                               | -                                     | +                                               | +                                             | -                           | <i>Pectobacterium</i>                      |
| OM/Z-2/10/15 | Co. Armagh | 2015 | +                                  | -                                    | -                                        | +                                                               | -                                     | +                                               | +                                             | -                           | <i>Pectobacterium</i>                      |
| O21/16       | Co. Antrim | 2016 | +                                  | nt                                   | -                                        | +                                                               | -                                     | +                                               | nt                                            | +                           | <i>Pantoea</i> sp. (MN692198)              |
| O21B/16      | Co. Antrim | 2016 | +                                  | nt                                   | -                                        | +                                                               | -                                     | +                                               | nt                                            | +                           | <i>Pantoea</i> sp. (MN720105)              |

## References

53. Fréchon, D.; Exbrayat, P.; Helias, V.; Hyman, L.J.; Jouan, B.; Llop, P.; Lopez, M.M.; Payet, N.; Pérombelon, M.C.M.; Toth, I.K.; et. al. Evaluation of a PCR kit for the detection of *Erwinia carotovora* subsp. *atroseptica* on potato tubers. *Potato Res.* **1998**, *41*, 163–173.
54. Pritchard, L.; Humphris, S.; Saddler, G.S.; Parkinson, N.M.; Bertrand, V.; Elphinstone, J.G.; Toth, I.K. Detection of phytopathogens of the genus *Dickeya* using a PCR primer prediction pipeline for draft bacterial genome sequences. *Plant Pathol.* **2013**, *62*, 587–596.
55. Waleron, M.; Waleron, K.; Podhajska, A. J.; Łojkowska, E. Genotyping of bacteria belonging to the former *Erwinia* genus by PCR-RFLP analysis of a *recA* gene fragment. *Microbiology*, **2002**, *148*, 583–595.
56. Darasse, A.; Priou, S.; Kotoujansky, A.; Bertheau, Y. PCR and restriction fragment length polymorphism of a *pel* gene as a tool to identify *Erwinia carotovora* in relation to potato diseases. *Appl. Environ. Microbiol.*, **1994**, *60*, 1437–1443.
