# Supplementary material for: Genomic Characterization, Formulation and Efficacy in Planta of a Siphoviridae and Podoviridae Protection Cocktail against the Bacterial Plant Pathogens Pectobacterium spp
Source: MDPI journal article supplement (doi:10.3390/v12020150), 2020-01-28
Supplement: s1 [file s1]

**Table S3.** Features of annotated bacteriophages genomes in this study by RAST, Virulence Finder, Res Finder 3.1 and ToxFinder.

| Bacteriophage                              |       |       |       |
|--------------------------------------------|-------|-------|-------|
| Feature                                    | φMA11 | φMA12 | φMA13 |
| GC content (%) <sup>a</sup>                | 48.9  | 51.6  | 53.4  |
| L50 <sup>a</sup>                           | 1     | 1     | 1     |
| Number of contigs (with PEGs) <sup>a</sup> | 1     | 1     | 1     |
| Number of subsystems (genes) <sup>a</sup>  | 5     | 5     | 1     |
| Number of coding sequences <sup>a</sup>    | 52    | 55    | 55    |
| Number of RNAs <sup>a</sup>                | 0     | 0     | 0     |
| Shiga-toxins <sup>b</sup>                  | 0     | 0     | 0     |
| Virulence genes <sup>b</sup>               | 0     | 0     | 0     |
| Antibiotic resistance genes <sup>c</sup>   | 0     | 0     | 0     |
| Mycotoxins <sup>d</sup>                    | 0     | 0     | 0     |

<sup>a</sup> Features determinate by RAST; <sup>b</sup>Features determinate by Virulence Finder; <sup>c</sup>Features determinate by ResFinder 3.1 at threshold 90% for identifying genes encoding resistance for: Aminoglycoside, Beta-lactam, Colistin, Fluoroquinolone, Fosfomycin, Glycopeptide, MLS – Macrolide, Lincosamide, Streptogramin B, Nitroimidazole, Oxazolidione, Phenicol, Rifampicin, Sulphonamide, Tetracycline and Trimethoprim; <sup>d</sup>Features identified by ToxFinder.
